# Supplementary material
Source: Springer Nature journal article supplement (https://www.springermedizin.de/resource/supplementary/12916_2011_458_MOESM1_ESM.pdf/9599730)

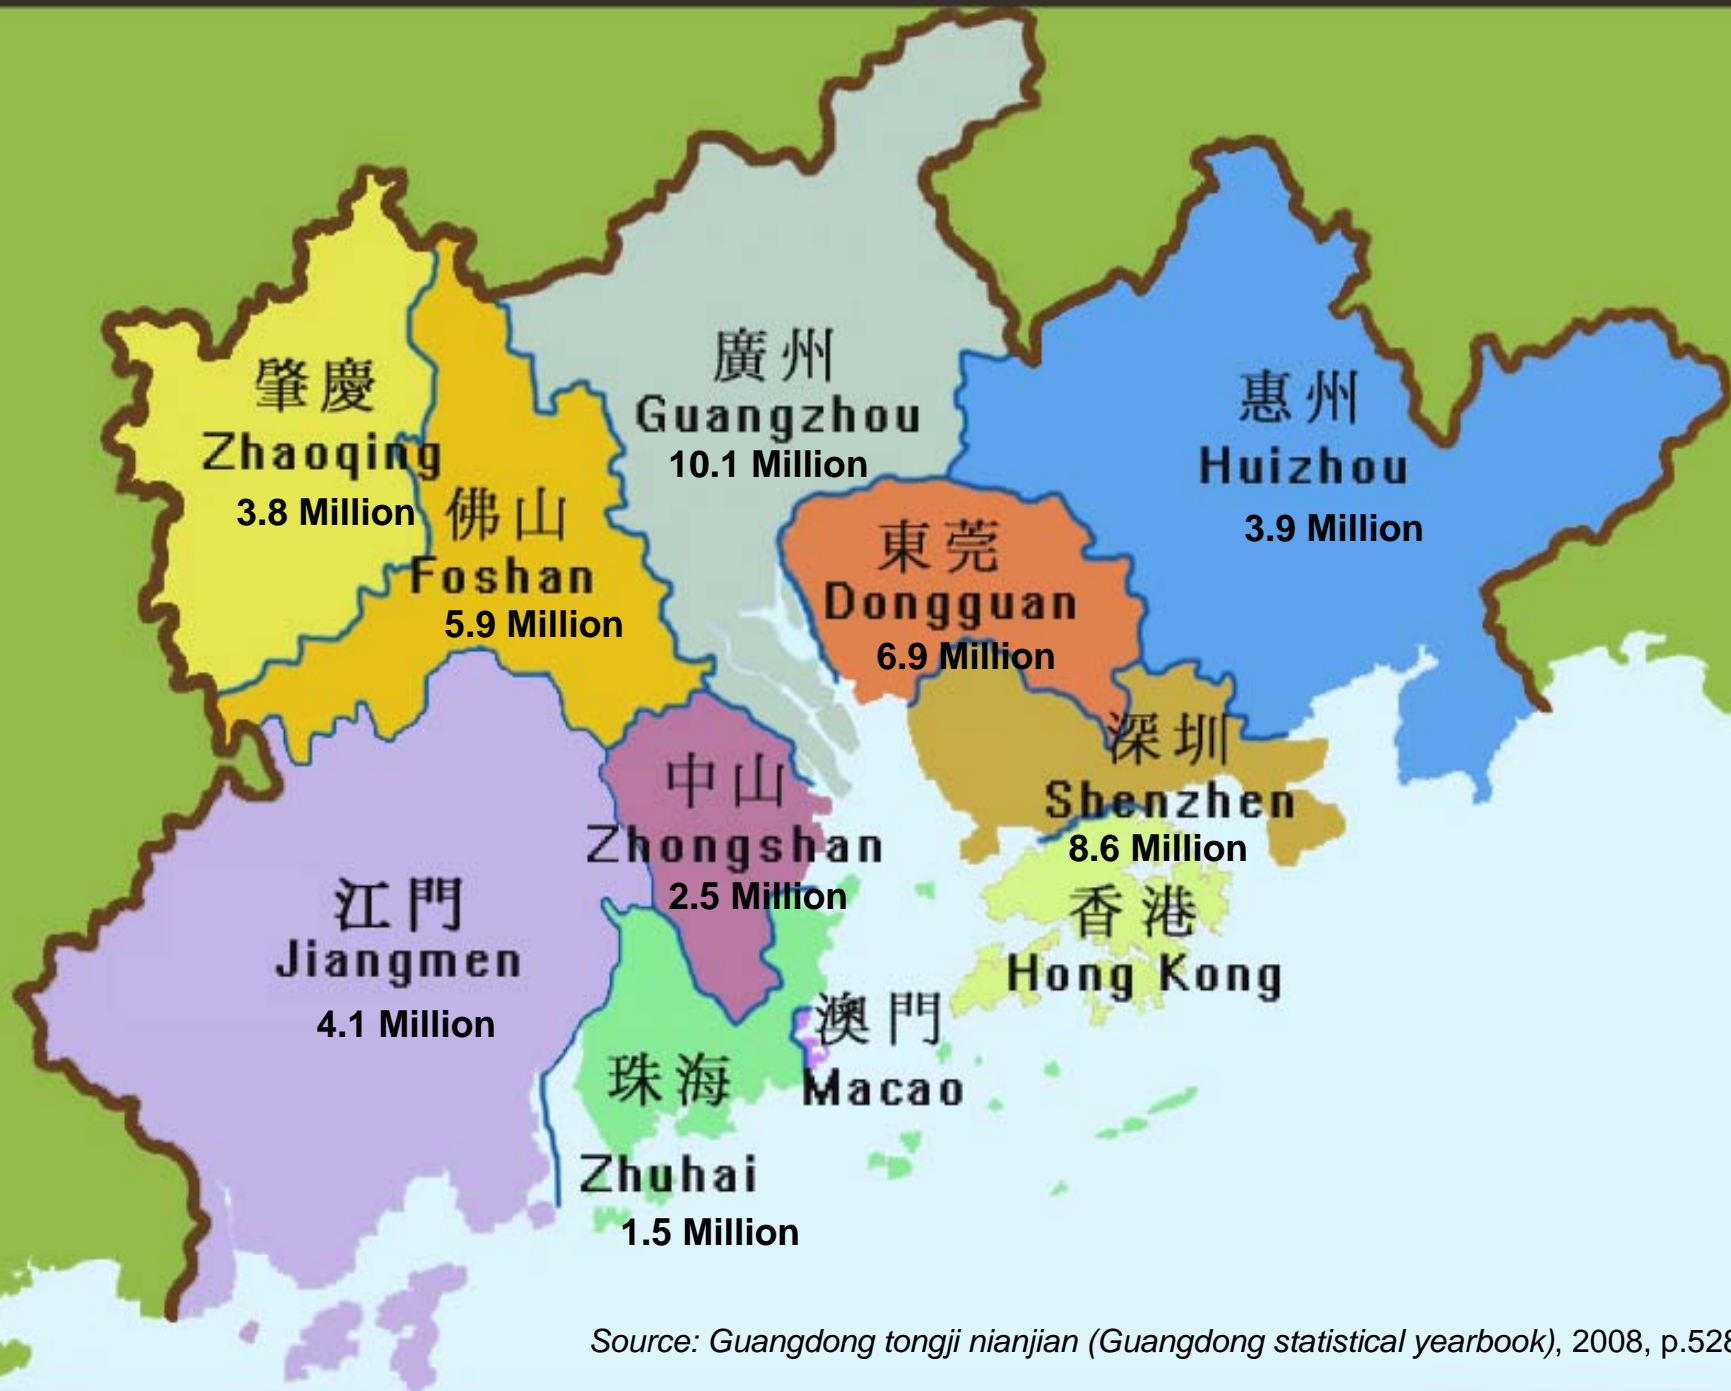

Source: Guangdong tongji nianjian (Guangdong statistical yearbook), 2008, p.528.

Supplement: MOESM1 [file 9599730]
